# Supplementary material for: Electrochemical elaboration of electrodes and electrolytes for 3D structured batteries
Source: Royal Society of Chemistry journal article supplement (doi:10.1039/c3ta11921a), 2013-01-01
Supplement: c3ta11921a.pdf [file c3ta11921a.pdf]

## Electronic Supplementary Information

Electrochemical Elaboration of Electrodes and Electrolytes for 3D Structured Batteries

Mario Valvo, Matthew Roberts, Gabriel Oltean, Bing Sun, David Rehnlund, Daniel Brandell, Leif Nyholm, Torbjörn Gustafsson, and Kristina Edström\*

Department of Chemistry – Ångström Laboratory, Uppsala University, Box 538, SE-751 21 Uppsala, Sweden.

\*Corresponding author. Tel. +46-18-4713713; fax +46-18-513548; E-mail Kristina.edstrom@kemi.uu.se

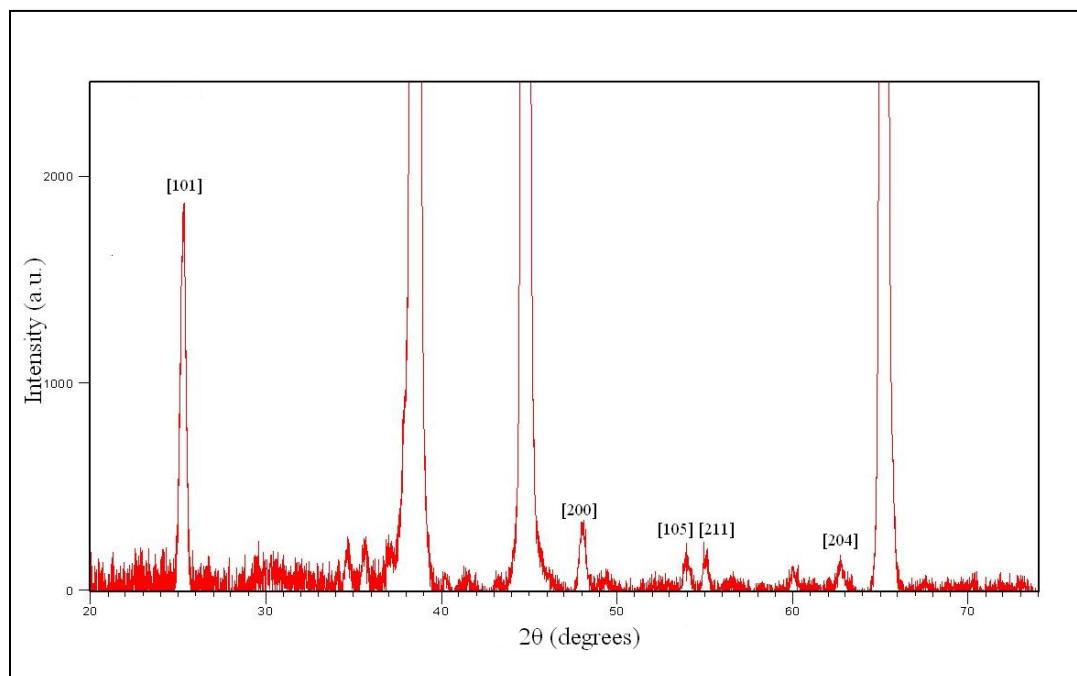

**S1 A** XRD diffractogram of Al nano-rods deposited with TiO<sub>2</sub> at 200°C of reaction temperature for 150 cycles. The peaks of TiO<sub>2</sub> (Anatase phase) are indexed.

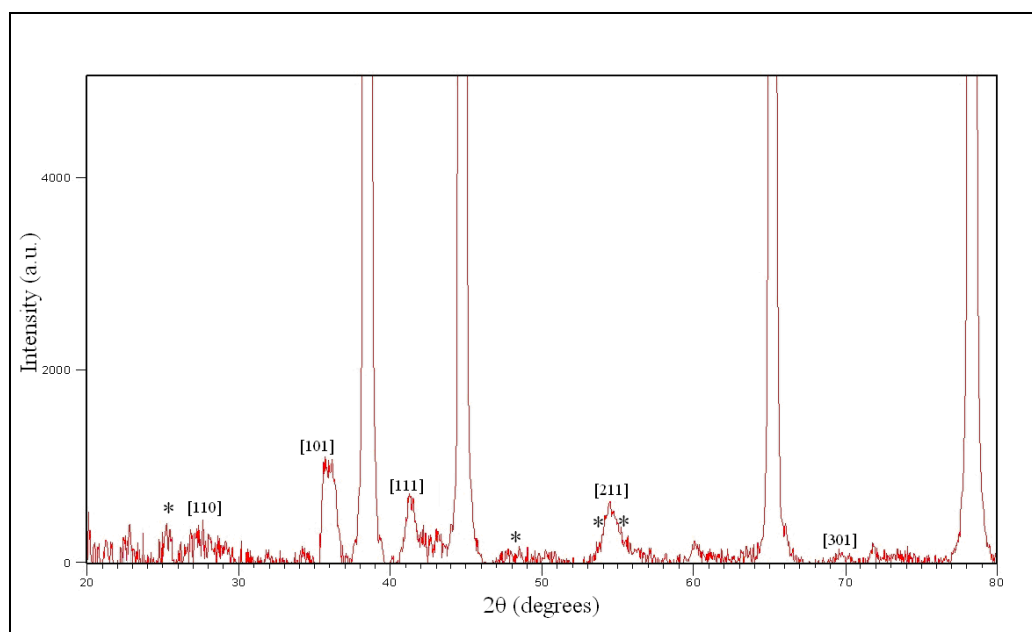

S1 B XRD diffractogram of Al nano-rods deposited with  $\text{TiO}_2$  at  $300^\circ\text{C}$  of reaction temperature for 75 cycles. The peaks of  $\text{TiO}_2$  (Rutile phase) are indexed. \* are the peaks position of  $\text{TiO}_2$  anatase phase.

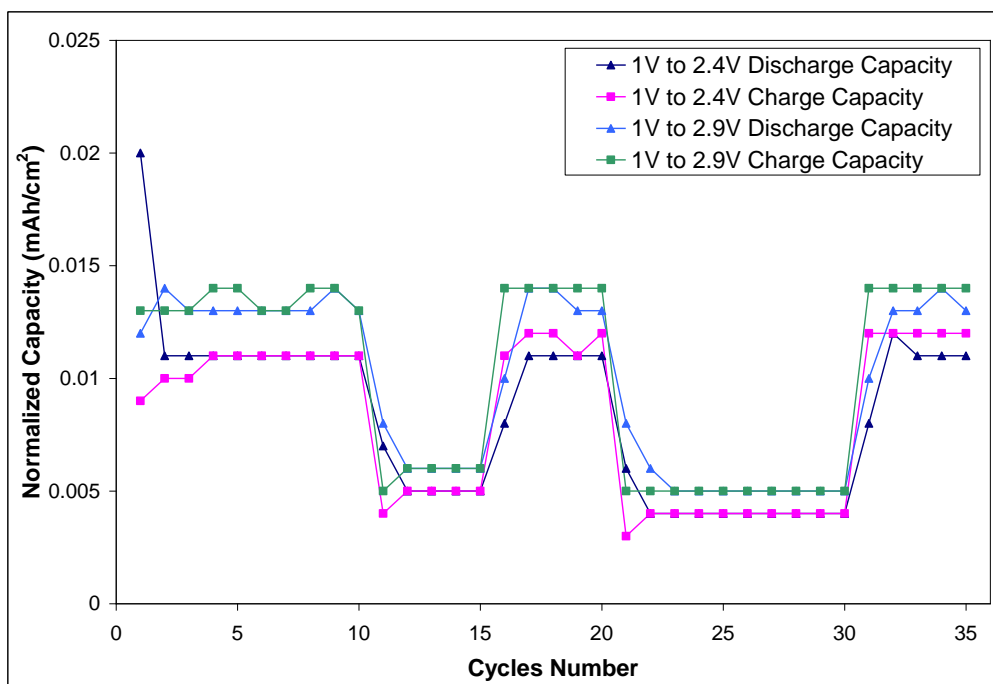

S2 A Evolution of capacity and rate capability as a function of cycle number and the cycling current. Two different range of cycling voltages, 1 V to 2.4 V and 1 V to 2.9 V were used. The electrode active material was deposited with ALD method at 200°C for 150 cycles.

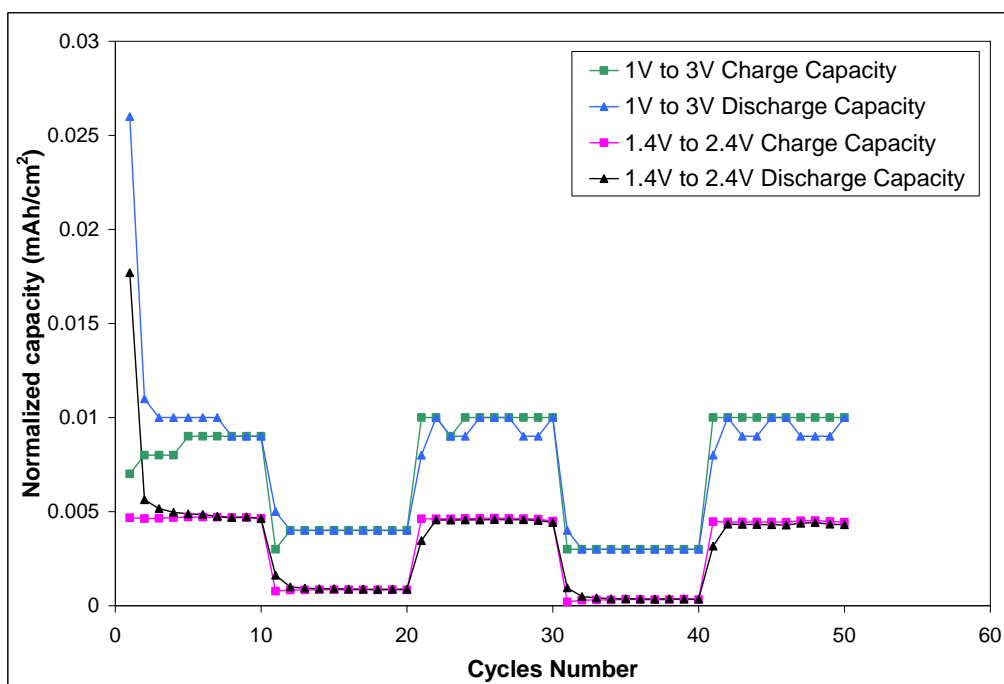

S2 B Evolution of capacity and rate capability as a function of cycle number and the cycling current. Two different range of cycling voltages, 1 V to 3 V and 1.4 V to 2.4 V were used. The electrode active material was deposited with ALD method at 300°C for 75 cycles.
